# Supplementary material for: Characterization of a splice-site mutation in the tumor suppressor gene FLCN associated with renal cancer
Source: Springer Nature journal article supplement (doi:10.1186/s12881-017-0416-5), 2017-05-12
Supplement: MOESM1 [file 12285194]

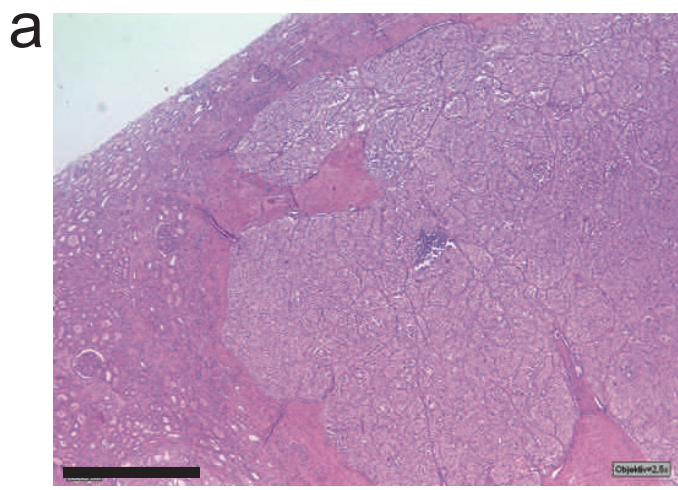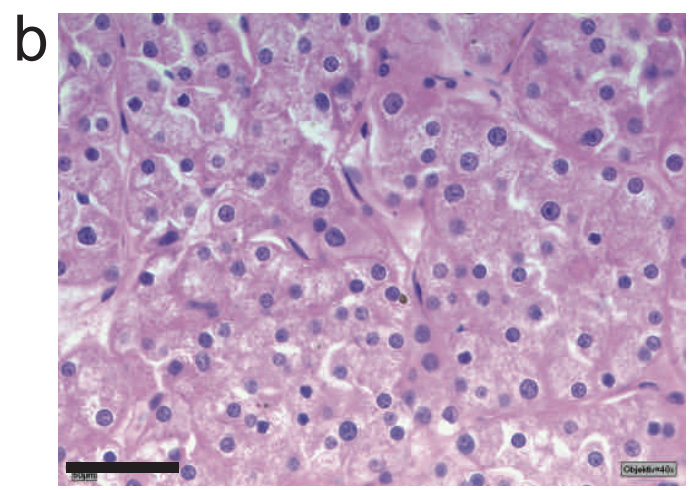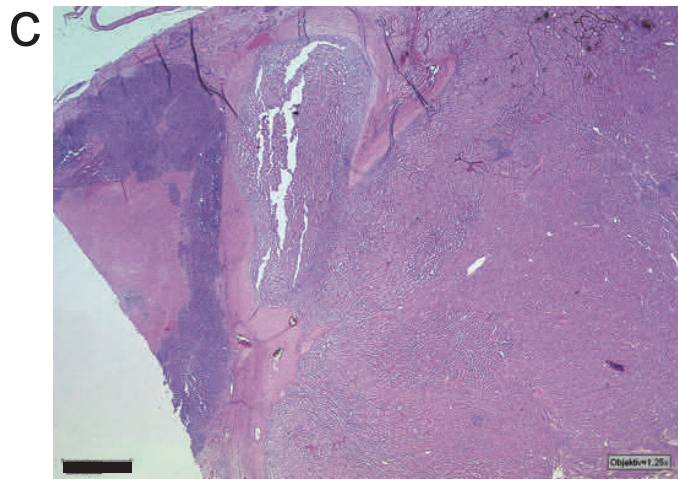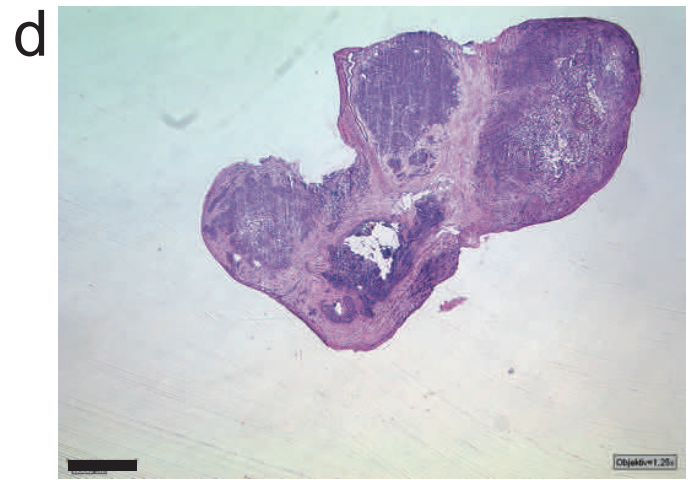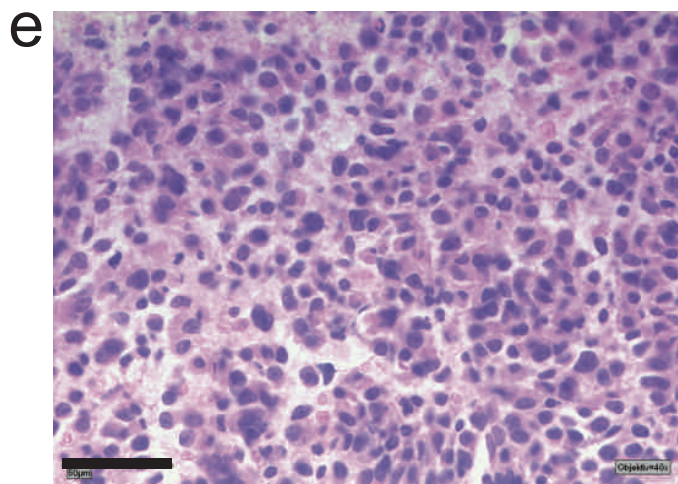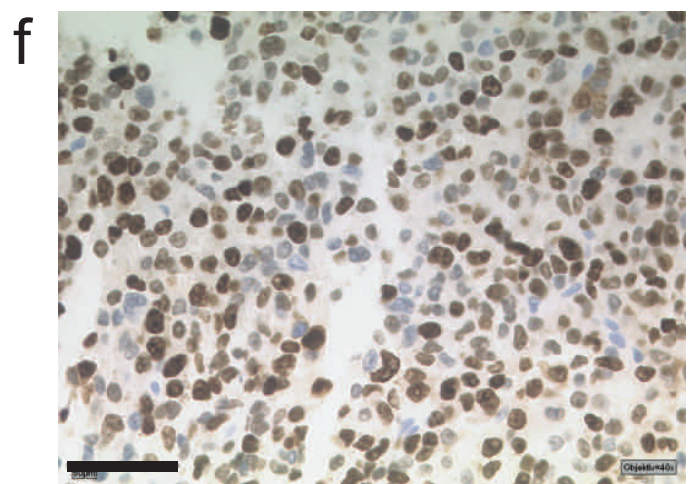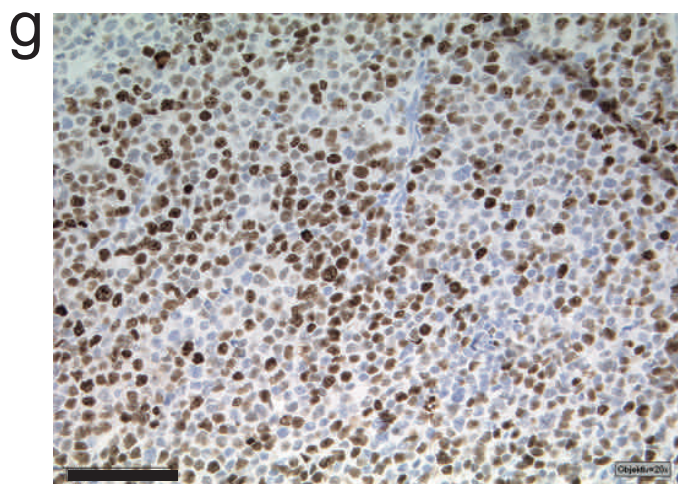

Supplementary Figure 1
